# Supplementary material for: Development of in situ synthesized Y-based nanoparticle/polyethersulfone adsorptive membranes by adjusting the composition of the coagulation bath for enhanced removal of fluoride
Source: Royal Society of Chemistry journal article supplement (doi:10.1039/c9ra01771b), 2019-01-01
Supplement: c9ra01771b1.pdf [file c9ra01771b1.pdf]

## RSC Advances Supporting Information

### Development of in-situ synthesized Y-based nanoparticle/ polyethersulfone adsorptive membranes by adjusting the composition of coagulation bath for enhanced removal of fluoride

Anan Cui<sup>a</sup>, Fan Ni<sup>b</sup>, Shihuai Deng<sup>a,\*</sup>, Jinsong He<sup>a,\*</sup>, Fei Shen<sup>a</sup>, Gang Yang<sup>a</sup>, Chun Song<sup>a</sup>, Dong Tian<sup>a</sup>,

Lulu Long<sup>a</sup>, and Jing Zhang<sup>a</sup>

<sup>a</sup>*Institute of Ecological and Environmental Sciences, Sichuan Agricultural University, Chengdu, Sichuan, 611130, China.*

<sup>b</sup>*Department of Chemical Engineering, Northwest University for Nationalities, Lanzhou, Gansu, 730030, China.*

\* **Corresponding author: Jinsong He, Shihuai Deng**

**Email addresses: [hejinsong@sicau.edu.cn](mailto:hejinsong@sicau.edu.cn), [shdeng8888@163.com](mailto:shdeng8888@163.com)**

### The pH effect on the leakage of Y-based NPs

The pH effect on the leakage of Y-based NPs in batch adsorption was also studied by measuring the Y<sup>3+</sup> concentration via an inductively coupled plasma mass spectrometer (ICP-MS, Agilent 7900).

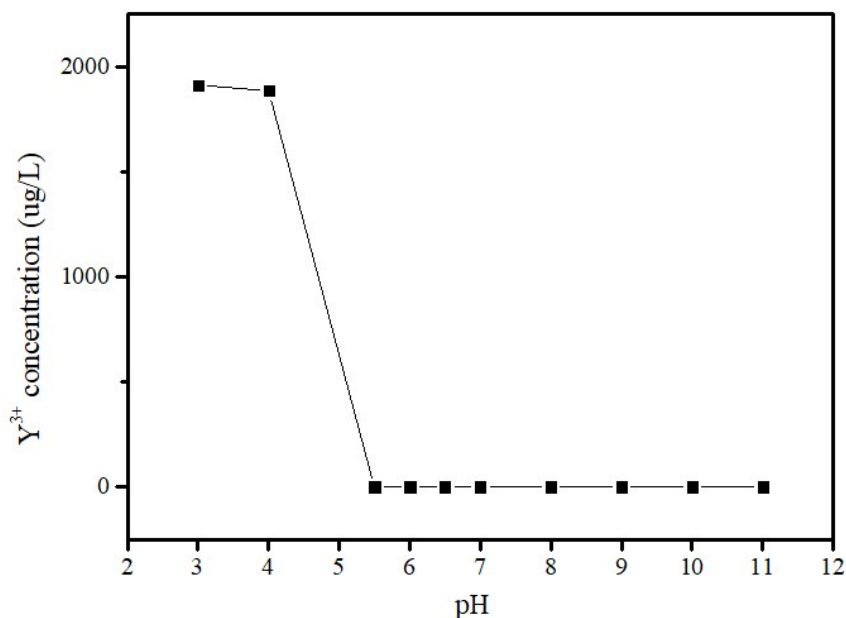

**Fig. S1** pH effect on the leakage of Y-based NPs

### The XPS analysis

The surface chemistry of Y-based NPs before and after adsorption of F<sup>-</sup> was studied by

the X-ray photoelectron spectroscopy (XPS) (ESCALAB 250Xi, Thermo Scientific, USA), with a monochromatic Al K $\alpha$  X-ray source (1486.8 eV). The high resolution scans were conducted according to the peak being examined with a pass energy of 30 eV and step size of 0.10 eV. To compensate for the charging effects, all spectra were calibrated with graphitic carbon as the reference at a binding energy (BE) of 284.8 eV. The XPS results were collected in binding energy forms and fit using a nonlinear least-square curve fitting program (XPSPEAK41 software).

**Table S1** The atomic content of virgin and F-loaded Y based NPs <sup>1</sup>

| Atomic content (%)   | C1s   | Y3d   | O1s   | F1s  |
|----------------------|-------|-------|-------|------|
| Y based NPs          | 34.09 | 14.46 | 51.45 | 0    |
| F-loaded Y based NPs | 35.05 | 14.14 | 43.86 | 6.95 |

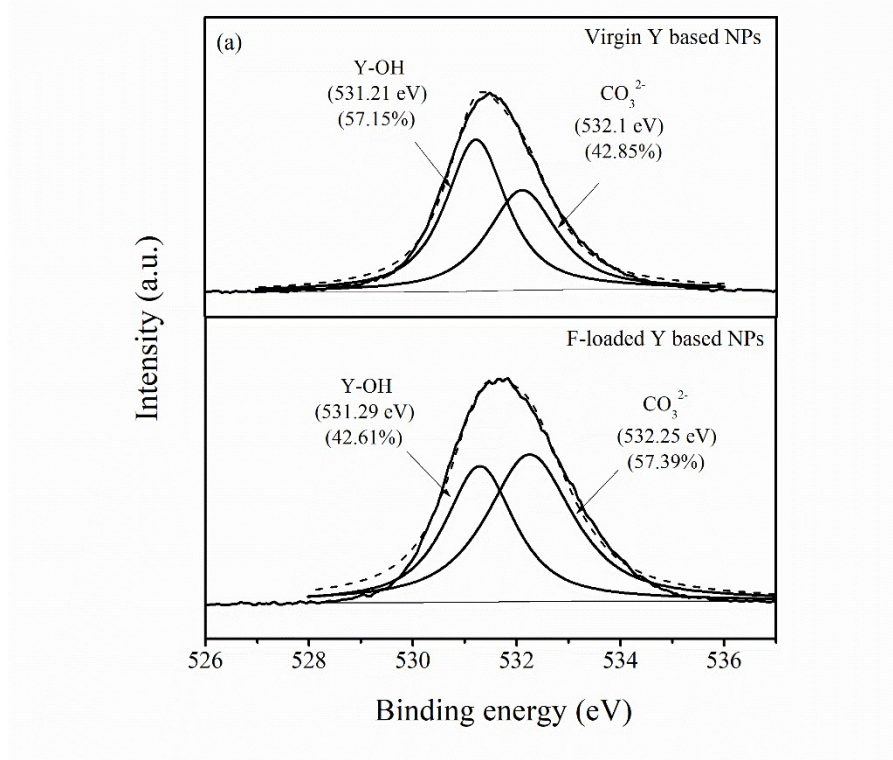

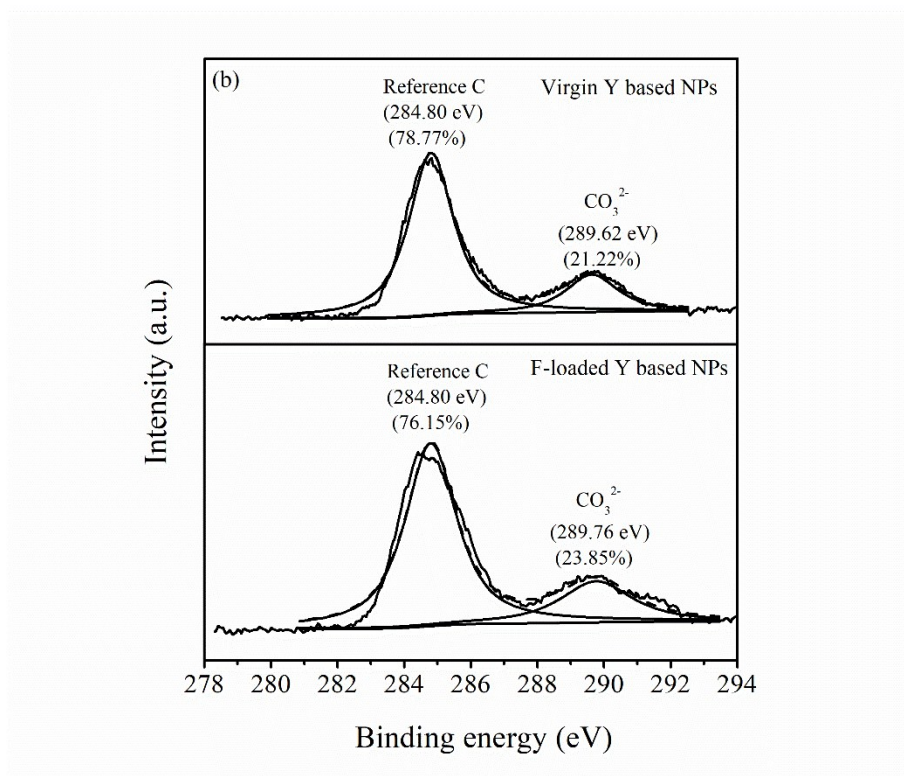

**Fig. S2** High resolution XPS spectra of (a) O1s and (b) C1s of Y-based NPs before and after adsorption<sup>1</sup>.

## Regeneration Experimental

0.05 g membrane M10-2 was first added into 100 mL of 50 mg/L fluoride solution for 24 h. After the adsorption, the used membrane was collected and desorbed into 100 mL of 0.01 M NaOH solution for 12 h. The regenerated membrane was then washed by DI water several times and reused for the subsequent adsorption experiment. Three adsorption-desorption cycles were conducted to evaluate the membrane reusability. The adsorption capacity in each cycle was determined and the regeneration rate was calculated.

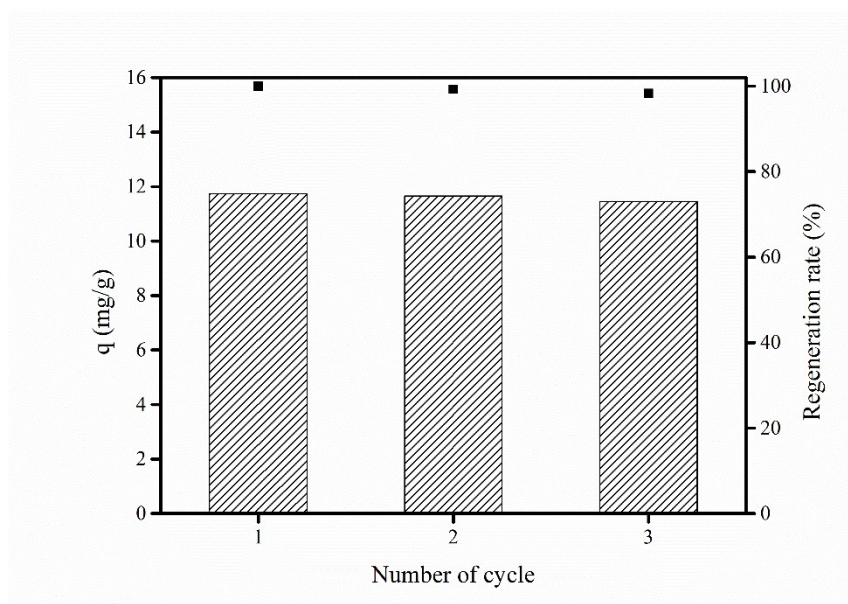

**Fig. S3** Regeneration performance of M10-2 for fluoride removal.

### References

1. J. He, A. Cui, F. Ni, S. Deng, F. Shen, C. Song, L. Lou, D. Tian, C. Huang and L. Long, *Journal of Colloid and Interface Science*, 2019, 536, 710-721.
